# Supplementary material for: Identification and Analysis of Senescence-Related Genes in Head and Neck Squamous Cell Carcinoma by a Comprehensive Bioinformatics Approach
Source: Hindawi journal article supplement (doi:10.1155/2022/4007469), 2022-10-17
Supplement: f1 [file 4007469.f1.zip]

**Table S1.** A list of 28 prognostic cellular senescence-associated genes using for molecular subtyping.

BLK  
BTG3  
CCND1  
CDKN2A  
DUSP16  
DUSP3  
ERRFI1  
FXR1  
GAPDH  
HSPA5  
ITSN2  
KL  
MAP2K1  
MAP2K7  
MAP3K6  
MAP4K1  
MXD4  
PCGF2  
PDIK1L  
PIAS4  
PKM  
PSMB5  
PSMD14  
RSL1D1  
SENP7  
SERPINE1  
TYK2  
YPEL3
