# Supplementary material for: Identification and Analysis of Senescence-Related Genes in Head and Neck Squamous Cell Carcinoma by a Comprehensive Bioinformatics Approach
Source: Hindawi journal article supplement (doi:10.1155/2022/4007469), 2022-10-17

Survival probability

Stage=I+II

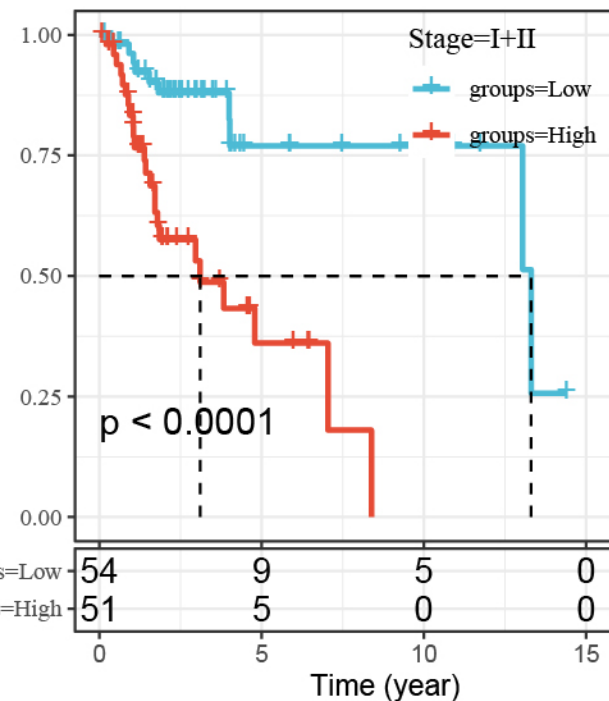

Survival probability

Stage=III+IV

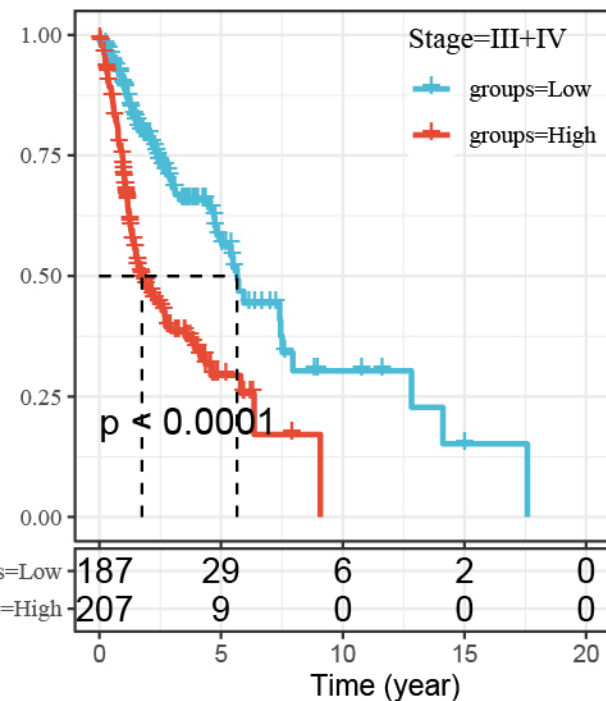

Survival probability

Grade=G1+G2

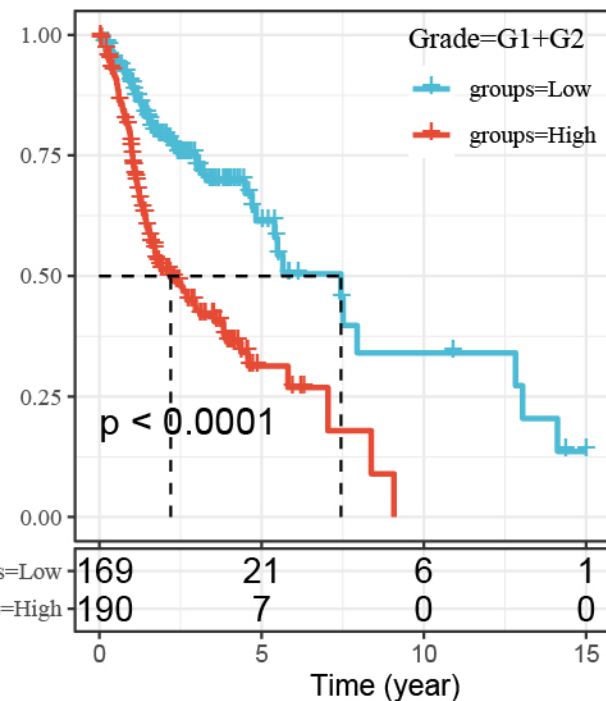

Survival probability

Grade=G3+G4

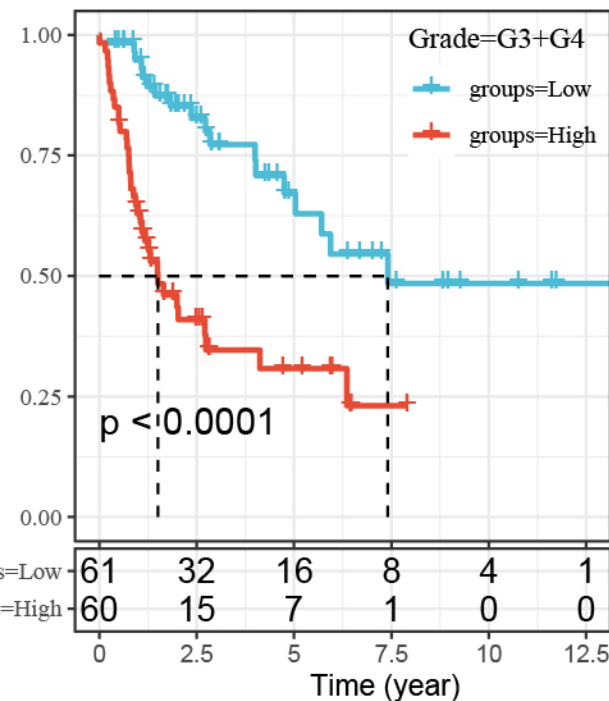

Survival probability

Age&lt;=60

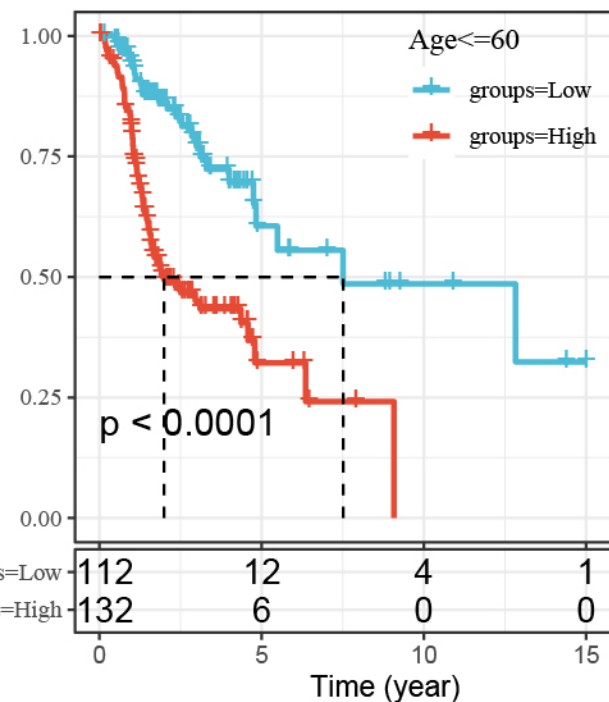

Survival probability

Age&gt;60

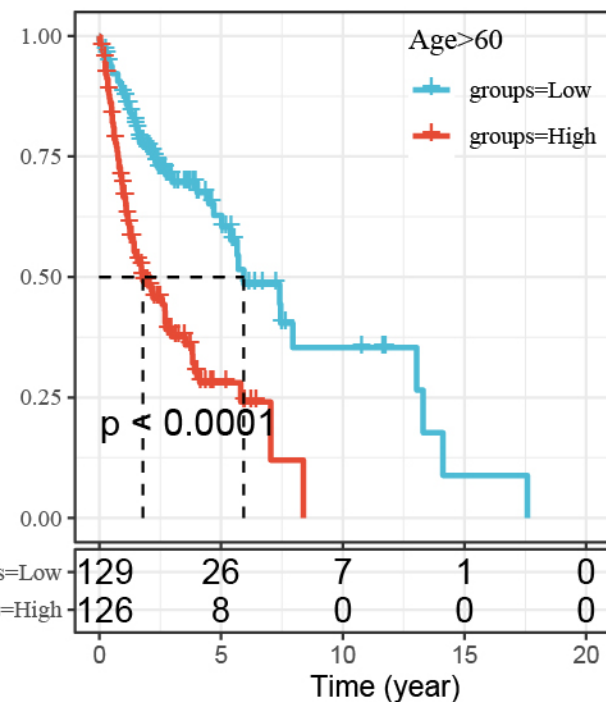

Survival probability

Gender=FEMALE

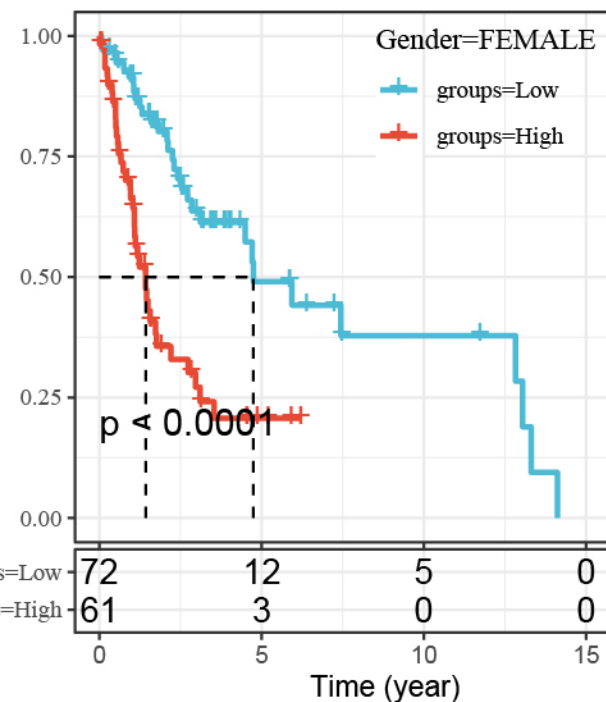

Survival probability

Gender=MALE

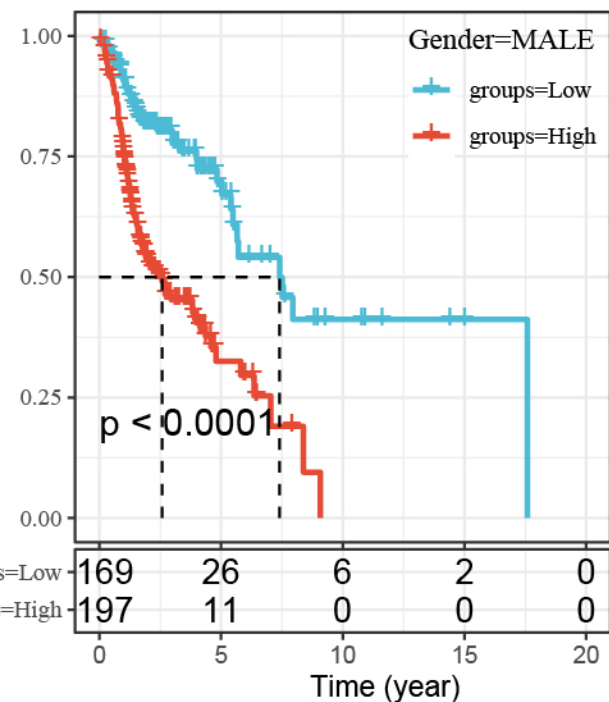

Supplement: f1 [file 4007469.f1.zip]
