# Supplementary figures and images for: Identification and Analysis of Senescence-Related Genes in Head and Neck Squamous Cell Carcinoma by a Comprehensive Bioinformatics Approach
Source: Hindawi journal article supplement (doi:10.1155/2022/4007469), 2022-10-17

**A**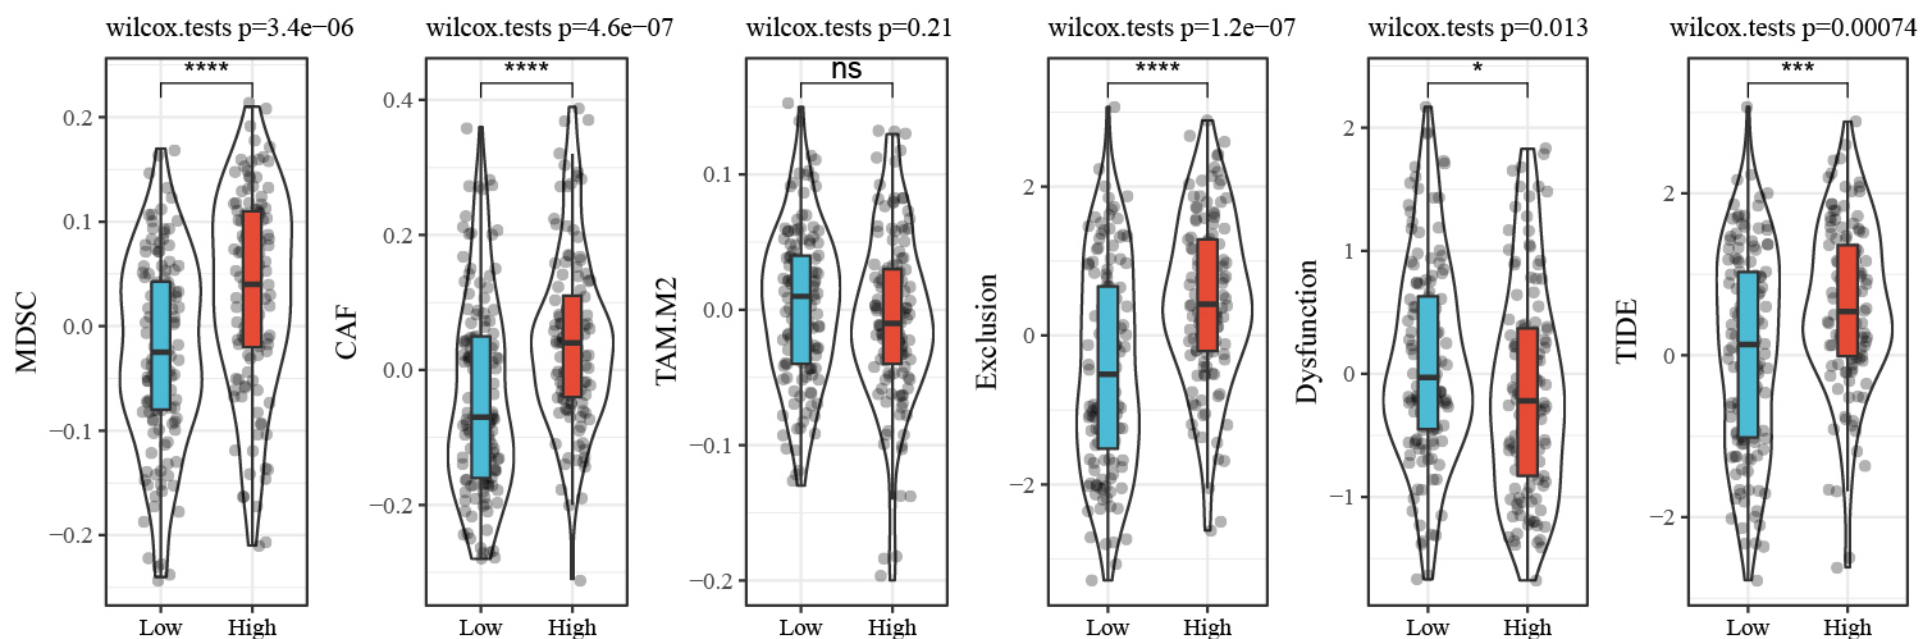**B**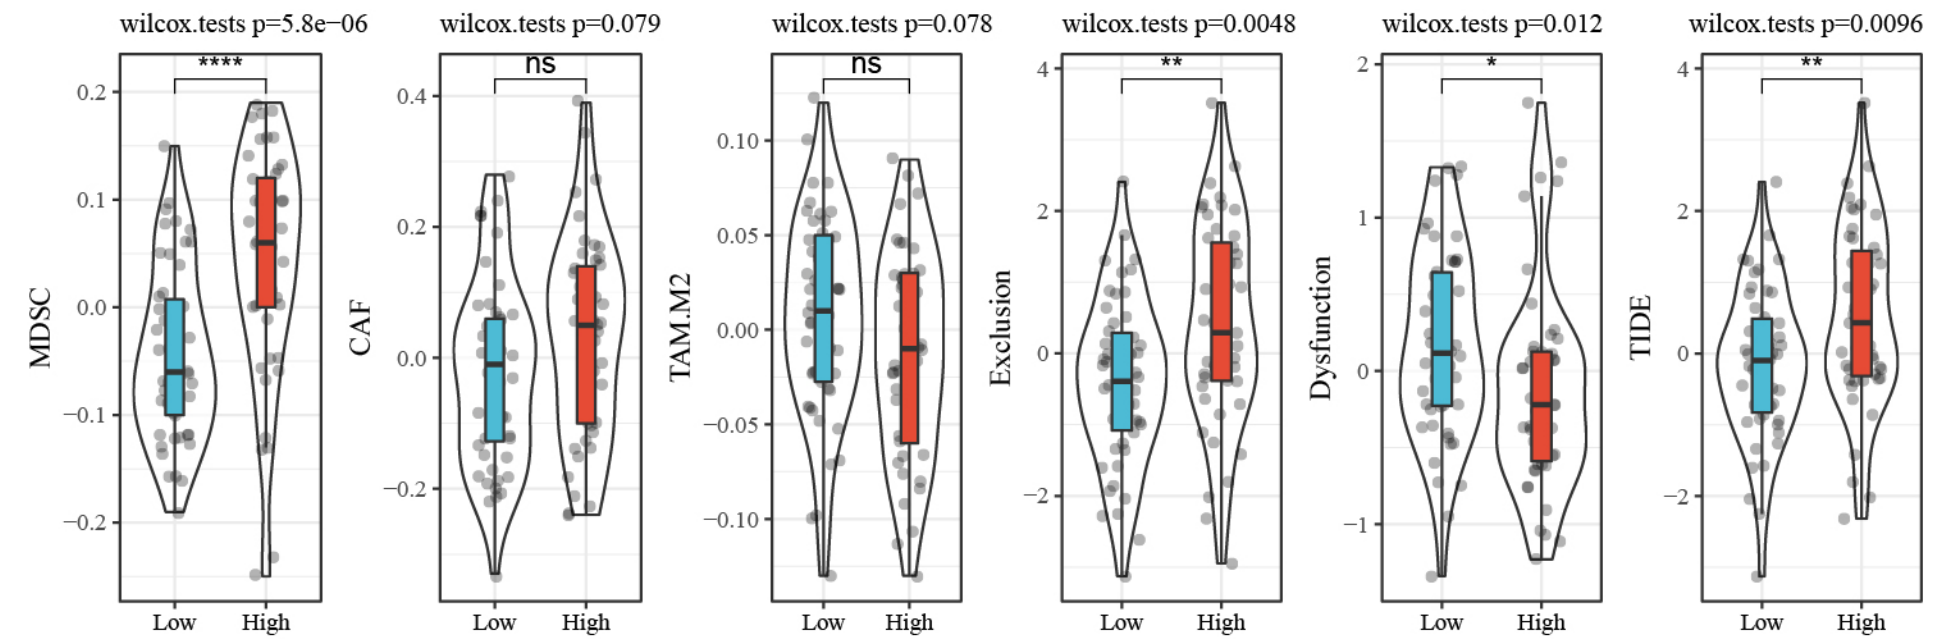**C**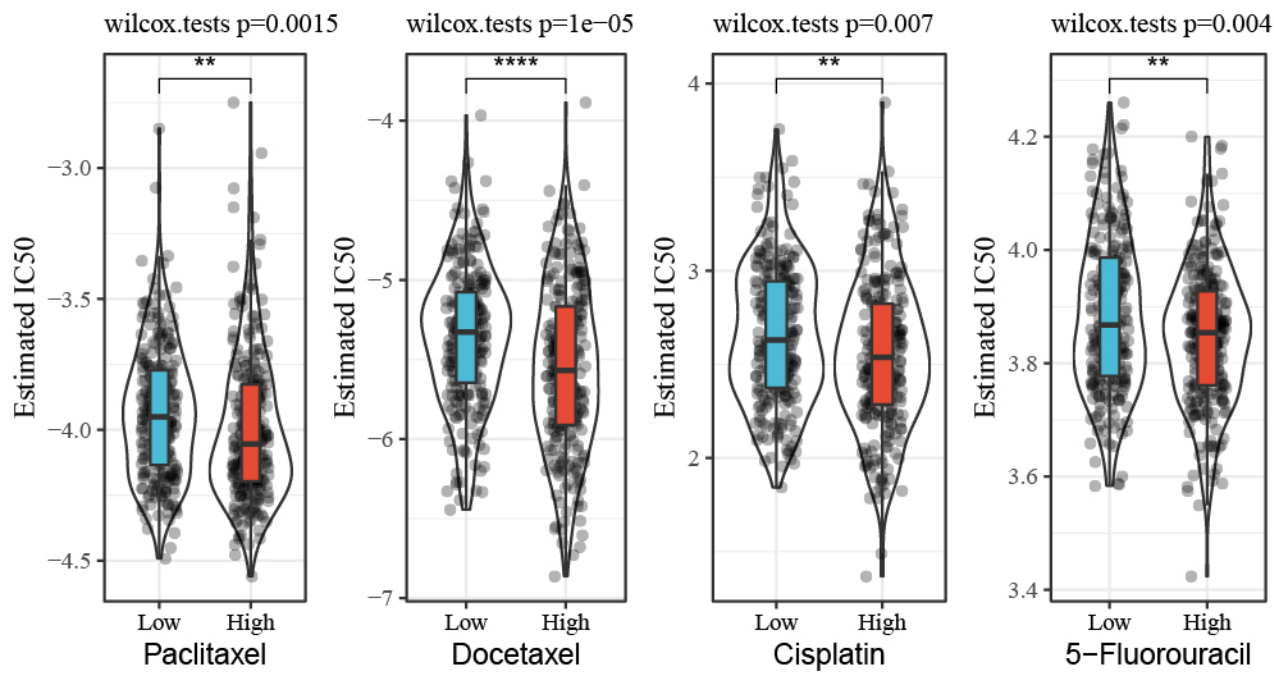**D**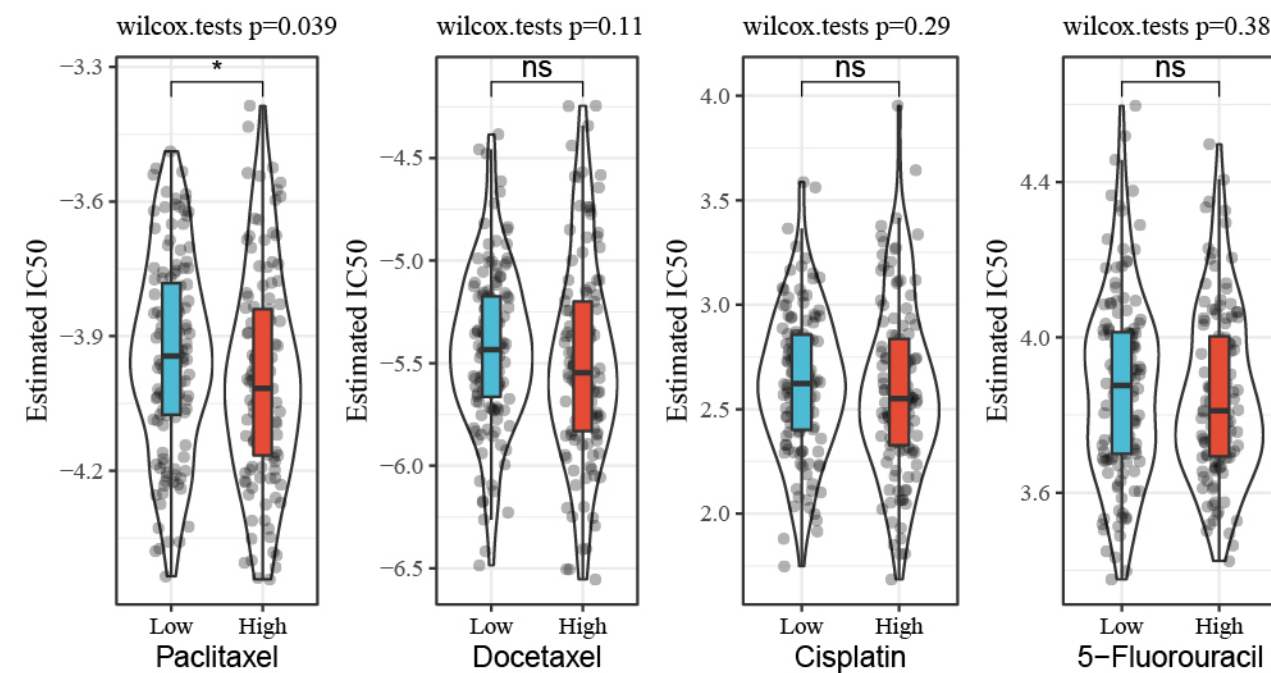**E**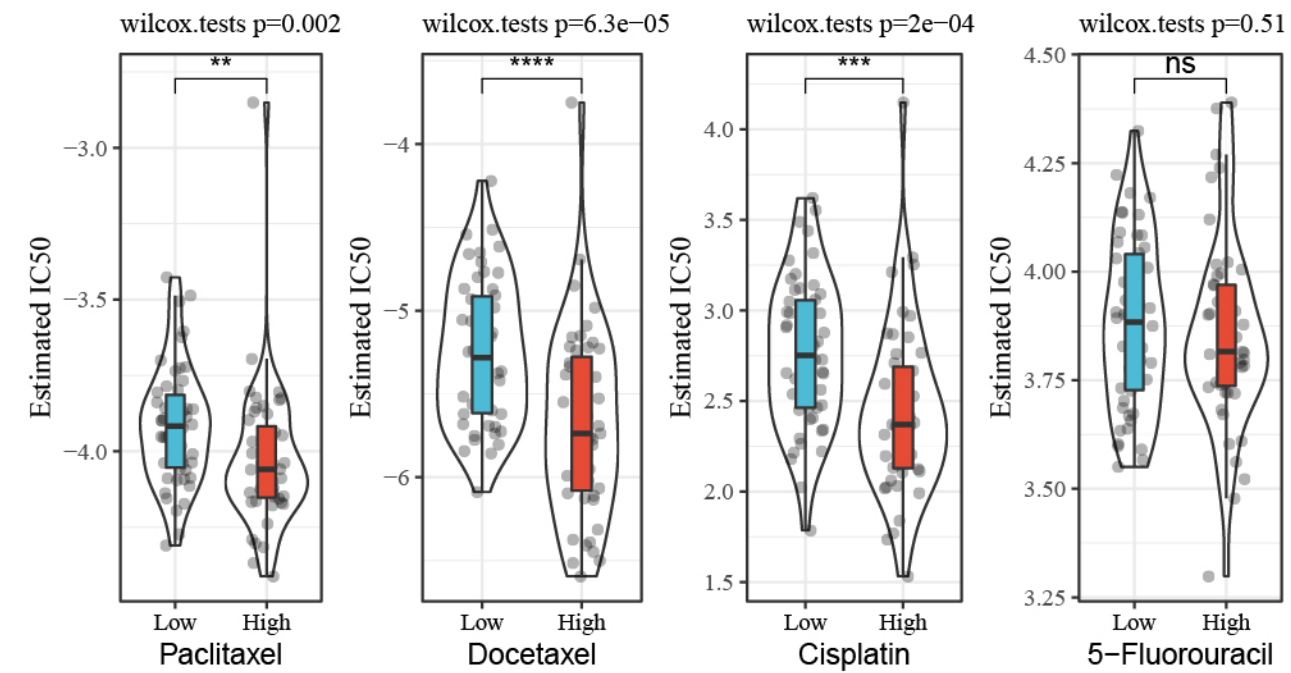

Supplement: f1 [file 4007469.f1.zip]

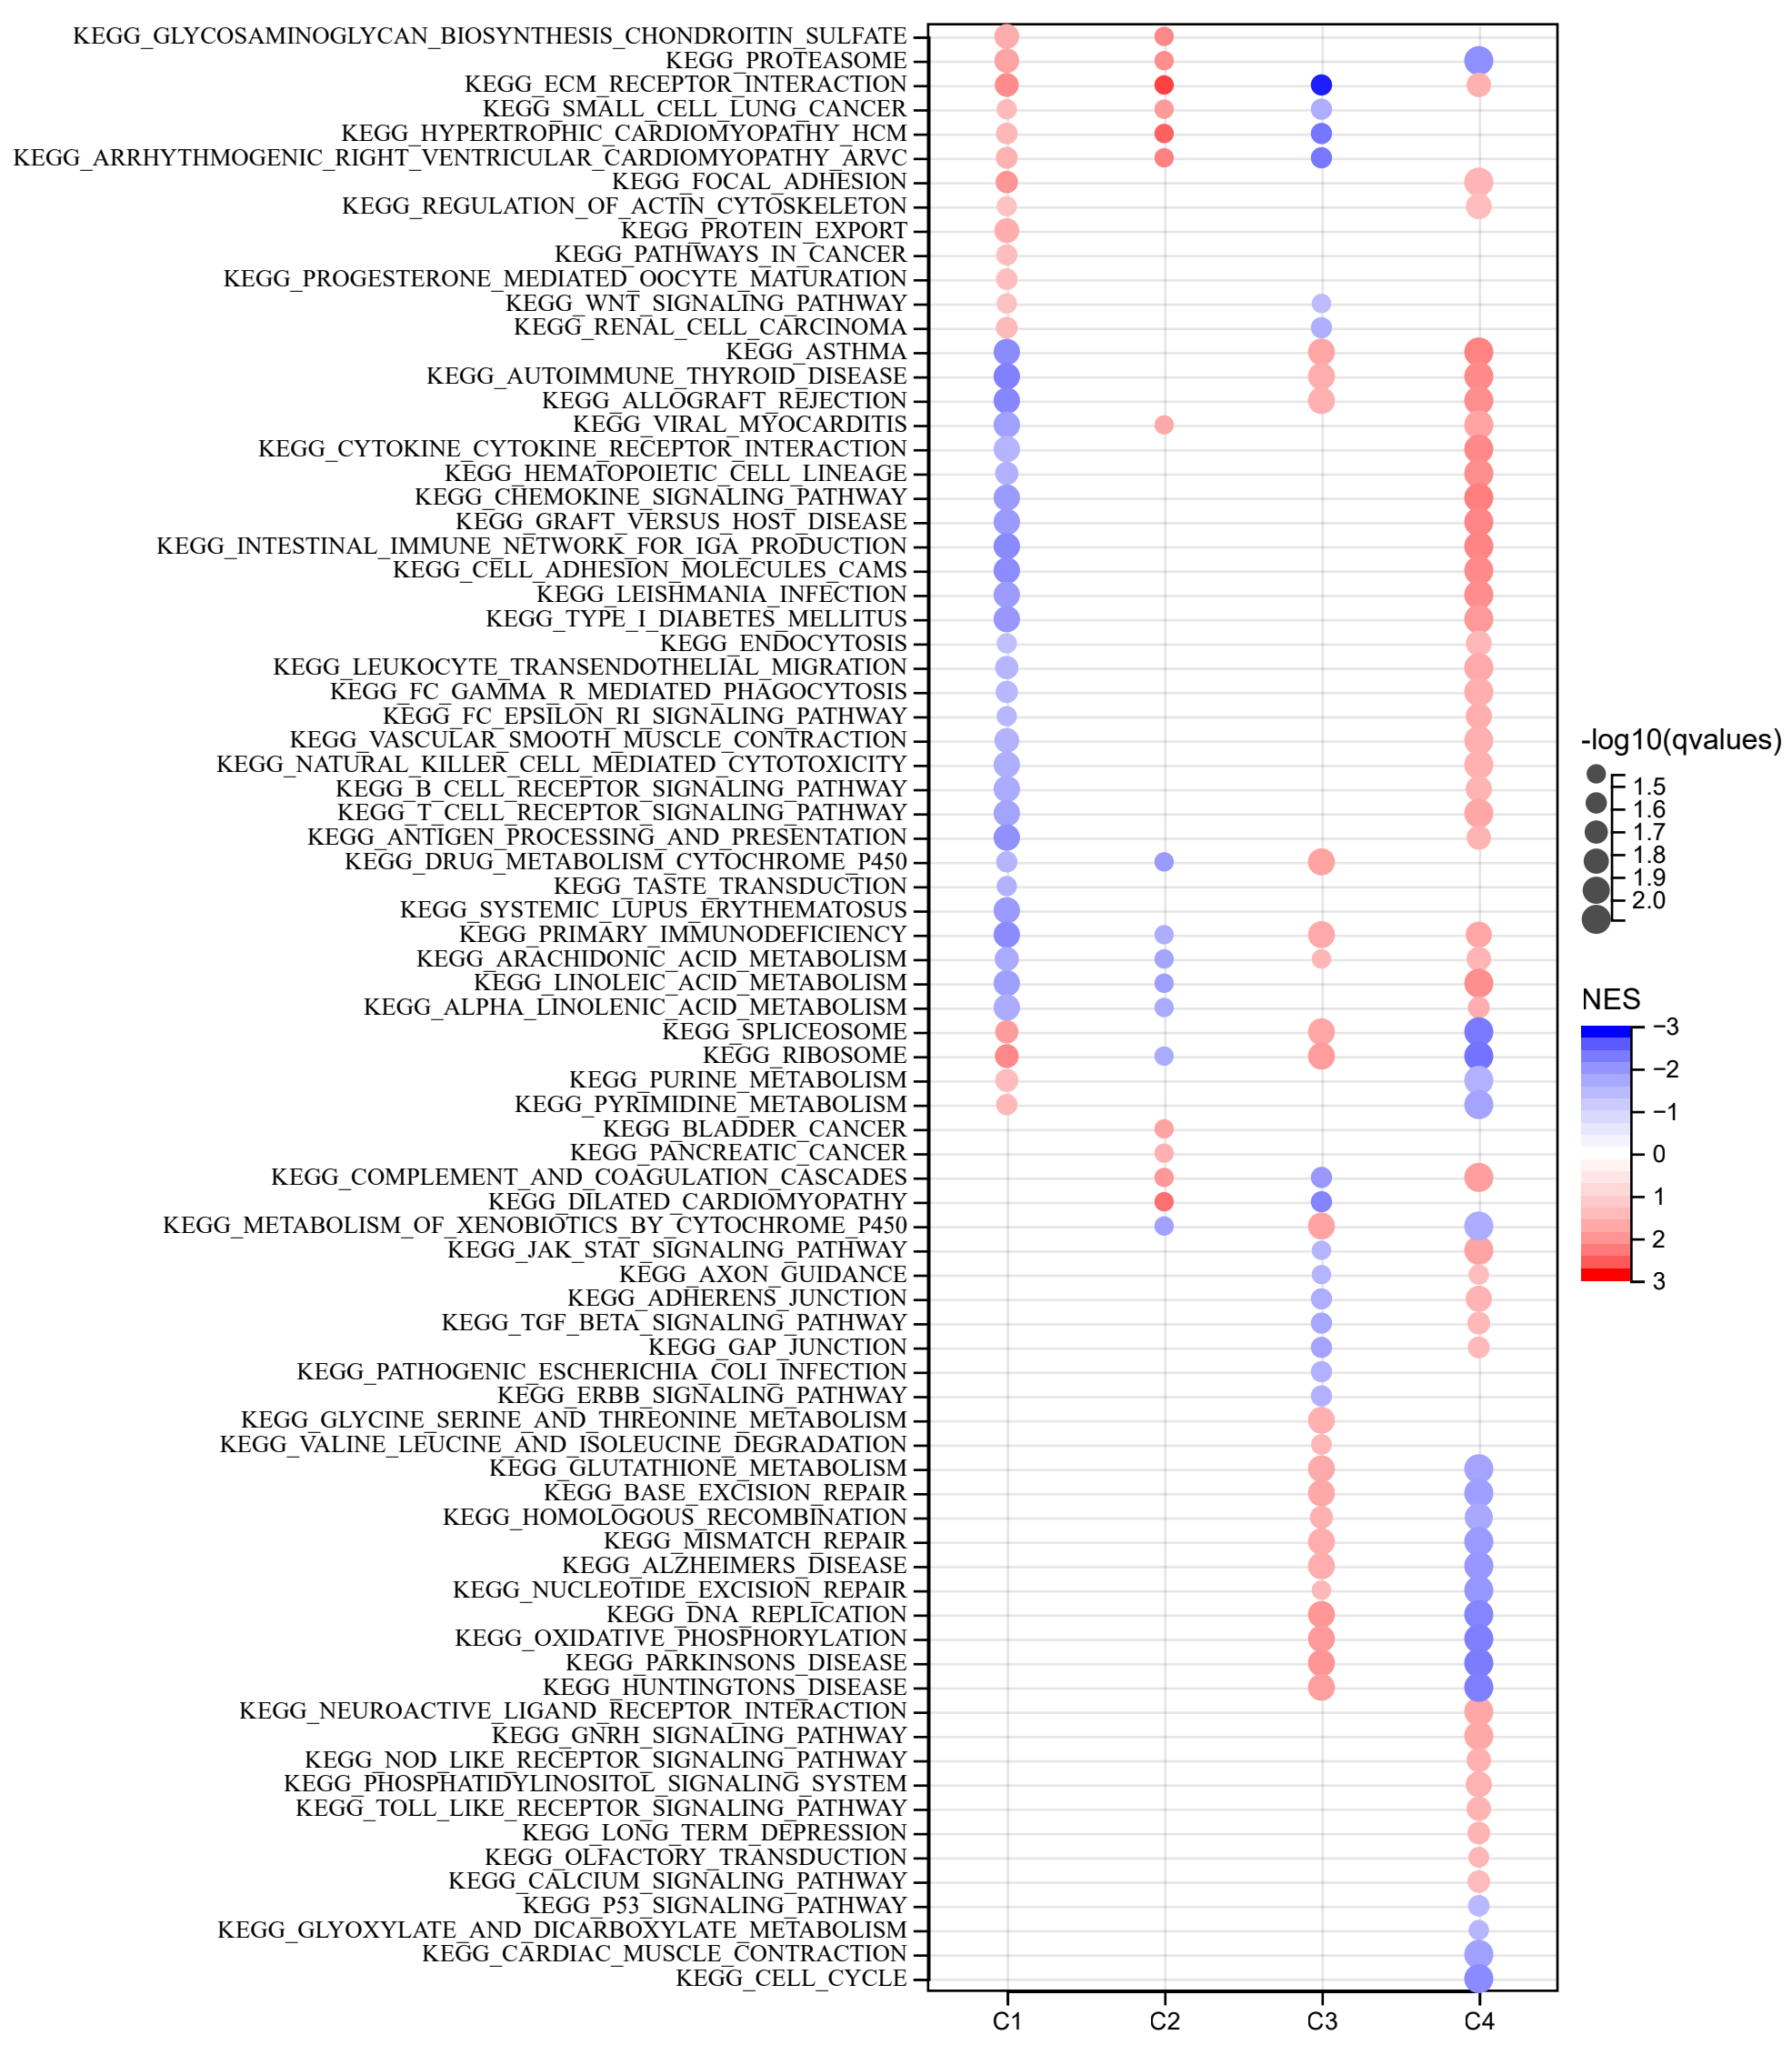

Supplement: f1 [file 4007469.f1.zip]

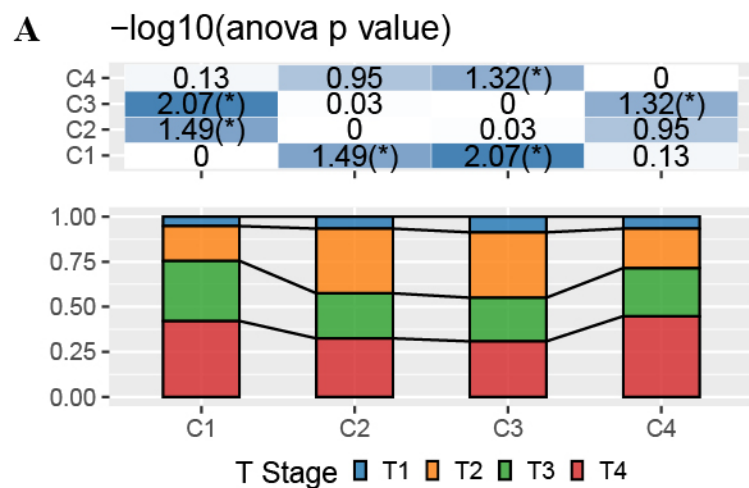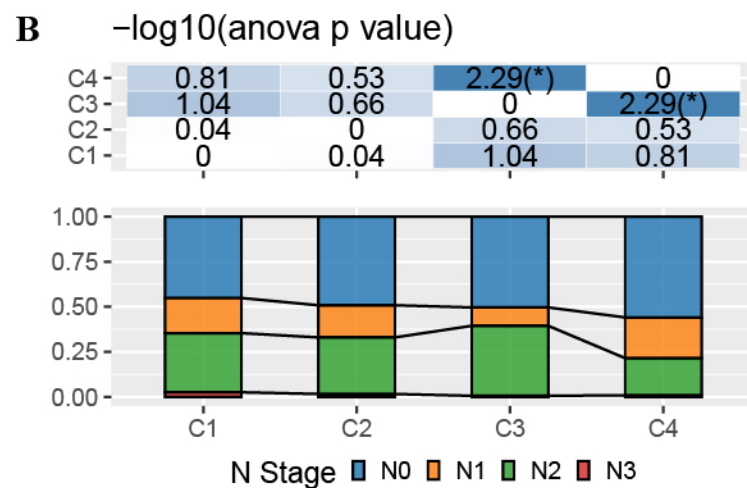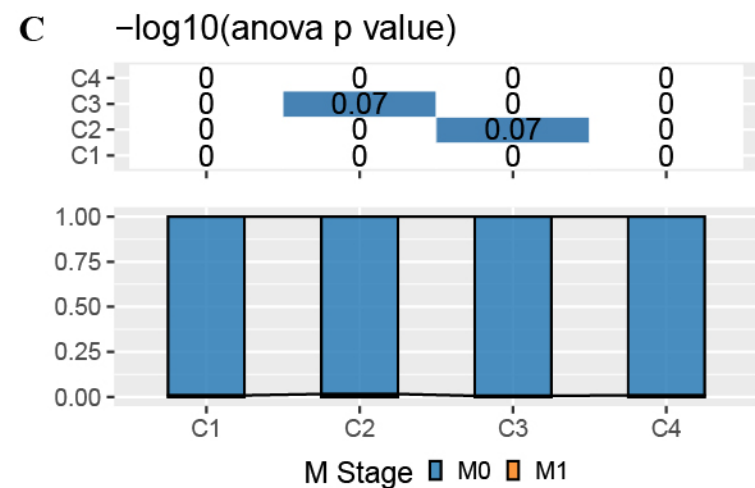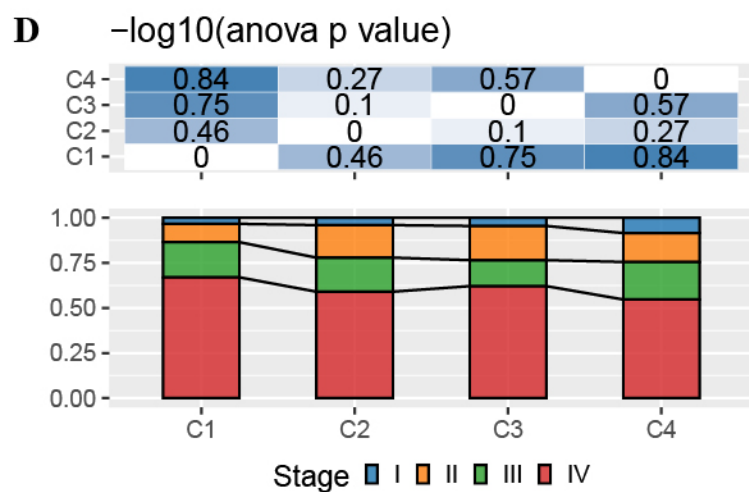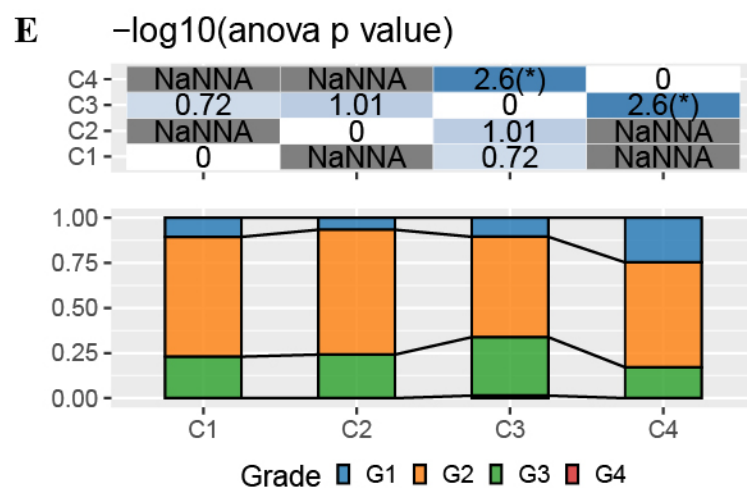

Supplement: f1 [file 4007469.f1.zip]
